# Supplementary material
Source: publisher figshare collection journal article supplement (https://geolsoc.figshare.com/ndownloader/files/28068026)
Supplement: Supplementary file 1 [file 28068026]

## Sheet: SI Table 2
Sample no.	Sample	mbsf	Lithology	PF Zone	mbsf	Preservation	Globigerina cf. trilobus/primordious (no supp. aperture)	Turborotalita praequinqueloba	Ciperoella anguliofficinalis	Ciperoella angulisuturalis	Ciperoella ciperoensis	Globoturborotalita barbula SEE NOTE IN CAPTION	Globoturborotalita bassriverensis	Globoturborotalita gnaucki	Globoturborotalita martini	Globoturborotalita ouachitaensis	Globigerina officinialis	Globigerina archaeobulloides	Globorotaloides sp.	Globorotaloides eovariabilis	Tenuitellinata angustiumbilicata	Tenuitella gemma	Dipsidrippella danvillensis	Globoquadrina binaensis	Dentoglobigerina galavisi	Dentoglobigerina pseudovenezuelana	Dentoglobigerina sellii	Dentoglobigerina sellii huge + bulla	Dentoglobigerina tapuriensis	Dentoglobigerina tripartita	Dentoglobigerina venezuelana	Dentoglobigerina cf. globularis small	Dentoglobigerina 'granade-shape'	Dentoglobigerina cf. ven. high spire	Dentoglobigerina cf. selli. subsphaerical	Paragloborotalia continuosa	Paragloborotalia griffinoides	Paragloborotalia opima	Paragloborotalia nana	Globorotalia semivera/amayeri group?	Catapsydrax dissimilis	Catapsydrax unicavus	Pseudohastigerina micra	Pseudohastigerina naguewichiensis	Globanomalina sp?	Cassigerinella chipolensis	Cassigerinella eocanica	Turborotalia altispiroides	Turborotalia ampliapertura
1	NKK-1/1, 32-34	3.38	Chalky marl	O5	3.38	P	C		F	C	C							C									C				F					R		R		F	F
2	NKK-1/2, 20-30	4.25	Chalky marl		4.25
3	NKK-1/2, 55-56	4.605	Chalky marl		4.605
4	NKK-1/2, 111-119	5.15	Chalky marl		5.15
5	NKK-1/3, 30-40	5.85	Chalky marl		5.85
6	NKK-1/4, 24-31	6.275	Chalky marl		6.275
7	NKK-1/5, 24-34	7.79	Chalky marl	O5	7.79	P
8	NKK-1/5, 40-54	7.97	Claystone	O4	7.97	P	F		C	C	C							C						F			C				C							F			F	F
9	NKK-1/6, 16-29	9.225	Claystone		9.225
10	NKK-1/7, 15-26	10.205	Claystone		10.205
11	NKK-1/7, 51-65	10.58	Claystone		10.58
12	NKK-1/8, 45-57	12.51	Claystone	O4	12.51	P			F	C	C							C									F				C		C			R		R		F	F	F
13	NKK-1/9, 26-38	13.82	Claystone		13.82
14	NKK-1/10, 7-24	15.155	Claystone	O4	15.155	P			C	C	F			C				C						R			C				A		F	C				C	C	F	C	C
15	NKK-1/10, 48-60	15.54	Claystone		15.54
16	NKK-1/11, 10-23	16.665	Claystone		16.665
17	NKK-1/11, 40-50	16.95	Claystone		16.95
18	NKK-1/11, 50-60	17.05	Claystone		17.05
19	NKK-1/11, 60-70	17.15	Claystone		17.15
20	NKK-1/11, 70-77	17.235	Claystone		17.235
21	NKK-1/12, 0-10	18.05	Silty claystone		18.05
22	NKK-1/12, 30-40	18.35	Silty claystone	O4	18.35	P-M			C	C	C			C				C	R					R			F				C	C	F	R				C	C		C	C
23	NKK-1/12, 44-56	18.5	Silty claystone		18.5
24	NKK-1/12, 56-68	18.62	Silty claystone		18.62
25	NKK-1/13, 30-40	19.85	Silty claystone		19.85
26	NKK-1/13, 70-80	20.29	Silty claystone		20.29
27	NKK-1/13, 91-100	20.455	Silty claystone		20.455
28	NKK-1/14, 0-15	21.075	Silty claystone	O4	21.075	P			C	F	C			F				C						R			C				A				C			F	F		C	C
29	NKK-1/14, 40-52	21.46	Silty claystone		21.46
30	NKK-1/15, 30-40	22.1	Silty claystone		22.1
31	NKK-1/15, 50-60	22.3	Silty claystone		22.3
32	NKK-1/15, 60-70	22.4	Silty claystone		22.4
33	NKK-1/15, 70-80	22.5	Silty claystone		22.5
34	NKK-1/15, 80-90	22.6	Silty claystone		22.6
35	NKK-1/16, 0-12	23.06	Silty claystone	O3	23.06	P			C		C			C				F								F	C			F	A			F	F			F	C		C	C
36	NKK-1/16, 50-54	23.52	Silty claystone		23.52
37	NKK-1/16, 80-95	23.875	Silty claystone		23.875
38	NKK-1/17, 13-25	24.69	Silty claystone		24.69
39	NKK-1/17, 48-60	25.04	Silty claystone		25.04
41	NKK-1/18, 0-13	26.065	Silty claystone	O3	26.065	P			C		R														C	C	C			F	A			F	F			F	C		C	C
42	NKK-1/18, 42-54	26.48	Silty claystone		26.48
43	NKK-1/19, 0-10	27.55	Silty claystone		27.55
44	NKK-1/19, 30-40	27.85	Silty claystone		27.85
45	NKK-1/19, 70-80	28.25	Silty claystone		28.25
46	NKK-1/19, 100-110,	28.55	Silty claystone		28.55
47	NKK-1/19, 120-130,	28.75	Silty claystone		28.75
48	NKK-1/19, 140-150,	29.45	Silty claystone		29.45
49	NKK-1/19, 160-170,	29.15	Silty claystone		29.15
50	NKK-1/19, 179-189	29.34	Silty claystone	O2	29.34	P								C										R	F	F	C			F	A							F	C		C	C							F
51	NKK-1/20, 12-24	29.68	Silty claystone		29.68
52	NKK-1/21, 12-22	30.17	Silty claystone		30.17
53	NKK-1/21, 48-60	30.54	Silty claystone		30.54
54	NKK-1/21, 76-86	30.81	Silty claystone		30.81
55	NKK-1/21, 103-113	31.08	Silty claystone	?	31.08	P			F					F	R		C				F?				C	C				F	C											C		R					C
56	NKK-1/21, 118-130	31.24	Silty claystone		31.24
57	NKK-1/22a, 8-12	31.6	Sandy clay	?	31.6	P											C							R	C	C				F	C								C			C							C
58	NKK-1/22, 20-28	31.74	Sandy clay		31.74
59	NKK-1/22, 80-87	32.335	Sandy clay		32.335
60	NKK-1/23, 43-56	32.995	Sandy clay		32.995
61	NKK-1/24, 23-33	32.78	Drilling slurry		32.78
62	NKK-1/24, 169-178	34.235	Drilling slurry		34.235
63	NKK-1/25, 40-47	35.935	Sandstone	?	35.935	PP
64	NKK-1/26, 0-10	36.55	Sandstone		36.55
65	NKK-1/27, 23-30	37.765	Sandstone		37.765
66	NKK-1/28,		Basalt
67	NKK-1/29, 56-65	40.105	Basalt		40.105
68	NKK-1/30, 34-43	40.885	Silty clay & claystone		40.885
69	NKK-1/30, 89-96	41.425	Silty clay & claystone	O1	41.425	M-P			F					F	F	C	C					C			C	C	R			C	A	F						F	C			C		A		F			A
70	NKK-1/30, 96-106 (NEW)	41.51	Silty clay & claystone	O1	41.51	G-M																																				C		A		F			A
71	NKK-1/31, 22-31	42.765	Silty clay & claystone	O1	42.765	G-M																																				C		A		F			A
72	NKK-1/31, 69-77	43.23	Silty clay & claystone	O1	43.23	G-M			F					F	C	C	F					C			C	C	F			F	C	A							A			C		A		F			A
73	NKK-1/32, 36-46	43.91	Silty clay & claystone	O1	43.91	M-G																																				C		A					A
74	NKK-1/32, 112-120	44.66	Silty clay & claystone	O1	44.66	M			F					F	C	C	C		F?			C			C	C	F			F	C	A						C	A			C		A					A
75	NKK-1/33, 32-43	45.375	Silty clay & claystone	O1	45.375	M-P			F					R	C	C	C					C			C	C	F			F	F	C							C			C		A					A
76	NKK-1/33, 95-105	46	Silty clay & claystone	O1	46	M-G			F					F	C	C	C					C			C		F			R	F	C							F			F		A		C			A
77	NKK-1/34, 19-29	46.74	Silty clay & claystone	O1	46.74	M-P			F					R	C	C	F					C			C	C	F			C	F	C						C	C			C		A		F			A
78	NKK-1/34, 105-115	47.6	Silty clay & claystone	O1	47.6	M-G																C			C	C	F			C	C							C	C			C		A		F			A
79	NKK-1/35, 25-35	48.3	Silty clay & claystone	O1	48.3	P-M			C		R			F	C	C	F					?			F	F	F			C	C							F	F			C		A		F			C
80	NKK-1/35, 80-90	48.85	Silty clay & claystone	O1	48.85	M-P			C					F	C	C	F					?			C	C	F			F	C							F	C			C		A		F			C
81	NKK-1/36, 45-54	49.995	Silty clay & claystone	O1	49.995	M-P			C					F	C	C	F					F			C	C	F			C	C								F			A		C					A
82	NKK-1/36, 81-90	50.355	Silty clay & claystone	O1	50.355	M-P																																				C		A		F			A
83	NKK-1/37, 33-43	51.13	Silty clay & claystone	O1	51.13	M-P			F					F	C	F	C				C?	?			C	F	F				F							C	C			C		C		C			A
84	NKK-1/38, 16-24 (NEW)	50.95	Silty clay & claystone	O1	51.43	M-P																			C	C				F												C		A					A
85	NKK-1/38, 24-36	51.8	Silty clay & claystone	O1	51.8	M-P								F	C	F	F					F			C	C	F			F	C							C	C			C		C					A
86	NKK-1/38, 92-101	52.465	Silty clay & claystone	O1	52.465	M-P								F	C	F	F					F			C	F	F			F	C							C	C			C		A		F			A
87	NKK-1/38, 108-116 (NEW)	52.62	Silty clay & claystone	O1	52.62	M-P									C	C	C					V			A	C				A	A								C			F		A					A
88	NKK-1/39, 40-50	53.45	Silty clay & claystone	E16	53.45	M-P									C	C	C					?			C	C				C								F	C			C	F	C		F			C
89	NKK-1/39, 50-61	53.555	Silty clay & claystone	E16	53.555	M-G								F	F	F	F					?			A	C				A	F							F	F			F	F	C					C
90	NKK-1/40, 50-60	54.55	Silty clay & claystone	E16	54.55	M-G								F	F	F	F		R			?			A	C				A	F							F	F			F	F	C					C
91	NKK-1/41, 60-70	55.65	Silty clay & claystone	E16	55.65	M-P			R					F	F	C	F					?			A	C				A	F								C			C	F	C					F
92	NKK-1/42, 62-71	56.665	Silty clay & claystone	E16	56.665	M-G			R					F	F	C	F					?			A	C				A	C								C			F	C	C					C
93	NKK-1/43, 10-20	57.15	Silty clay & claystone		57.15
94	NKK-1/43, 42-52	57.47	Silty clay & claystone	E16	57.47	M-G			R					F	F	C	F					?			A	C				A	C								C			C	C	C					C
95	NKK-1/43, 100-109	58.045	Silty clay & claystone		58.045
96	NKK-1/44, 30-40	58.85	Silty clay & claystone		58.85
97	NKK-1/44, 40-50	58.95	Silty clay & claystone	E16	58.95	M-P			R					F	F	C	F					?			A	C				A	C								F			C	C	C					C
98	NKK-1/45, 49-59	60.04	Silty clay & claystone		60.04
99	NKK-1/46, 40-49	60.945	Silty clay & claystone	E16	60.945	M-G									C	C	C					?			A	C				A	C								F			F	C	C					C
100	NKK-1/46b, 100-110	61.55	Silty clay & claystone	E16	61.55	G									C	C	F		F			R			A	C				A								C	C			C	A	F					C
101	NKK-1/47, 45-55	62.5	Silty clay & claystone		62.5
102	NKK-1/47, 90-100	62.95	Silty clay & claystone	E16	62.95	M-G									C	C	F		?			R			A	C				A	F							A	A			C	A	C					C
103	NKK-1/48, 30-40	64.35	Silty clay & claystone		64.35
104	NKK-1/48, 98-108	65.03	Silty clay & claystone	E16	65.03	G-M									C	C	F		?						A	C				A	F							A	A			C	C						C
105	NKK-1/49, 44-57	66.005	Silty clay & claystone		66.005
106	NKK-1/50, 38-47	66.925	Silty clay & claystone	E16	66.925	G-M									C	C	F		?						A	C				A								A	A			C	C	F					A
107	NKK-1/51, 32-42	67.87	Silty clay & claystone	E16	67.87	G-EXC									C	C	F		?						A	C				A								A	A			C	C	F					A
109	NKK-1/52, 36-44	69.4	Silty clay & claystone		69.4
110	NKK-1/52, 70-78	69.74	Silty clay & claystone		69.74							C
111	NKK-1/53, 30-42	70.86	Silty clay & claystone	E15	70.86	G-EXC									C	C	?								A	C				A												C							A
112	NKK-1/54, 23-34	72.285	Silty clay & claystone		72.285
113	NKK-1/54, 105-114	73.095	Silty clay & claystone	E15	73.095	G-EXC									C	C	F		?						A	C				A								F	C			C	C						A
114	NKK-1/55, 25-36	73.555	Silty clay & claystone		73.555
115	NKK-1/55, 101-111	74.31	Silty clay & claystone	E15	74.31	G-EXC									C	C	F		?						A	C				A								F	C			C	A						C
116	NKK-1/56, 20-30	75	Silty clay & claystone		75
117	NKK-1/57, 22-32	76.02	Silty clay & claystone	E15	76.02	G-EXC									C	C	?								A	C				C								C	A			C	A						A
118	NKK-1/58, 24-32	77.03	Silty clay & claystone	E15	77.03	M									F	F									A	F				C								F	C			C	C						A
119	NKK-1/58, 94-105	77.745	Silty clay & claystone		77.745
120	NKK-1/59, 48-57	78.775	Silty clay & claystone		78.775
121	NKK-1/59, 94-105	79.245	Silty clay & claystone	E15	79.245	G-EXC									C	C	F		F						A	F												F	C			F	A						C
122	NKK-1/59, 100-110	79.3	Silty clay & claystone		79.3
123	NKK-1/60, 33-42	80.51	Silty clay & claystone	E15	80.51	G-M									F	C									C	F				F									A			C	A						C
124	NKK-1/61, 35-47	81.91	Silty clay & claystone		81.91
125	NKK-1/61, 91-101	82.46	Silty clay & claystone	E15	82.46	G-EXC									C	C	F								C																	C							A
126	NKK-1/62, 4-14	82.84	Silty clay & claystone	E15	82.84	G-EXC									C	C	F		F						A	F													C			F	A						C
127	NKK-1/63, 0-10	84.05	Silty clay & claystone	E15	84.05	G-EXC									C	C	F		F						A	F													F			F	F						C
128	NKK-1/64, 6-14	85.1	Silty clay & claystone	E15	85.1	G-EXC									C	C	F		F			?			A	F												F	C			F	A						C
129	NKK-1/65, 35-45	86.4	Silty clay & claystone	E15	86.4	G-EXC			R					F	C	C	C					?			A	F				F						R			C		R	C	A
130	NKK-1/66, 24-33	87.785	Silty clay & claystone	E14	87.785	M-P																			F	C																F
131	NKK-1/67, 36-45	88.905	Clays & tuffaceous sands	E13	88.905	P																															R					F	C
132	NKK-1/68,		Clays & tuffaceous sands
133	NKK-1/69,		Clays & tuffaceous sands
134	NKK-1/70, 6-16	90.11	Clays & tuffaceous sands	E13	90.11	P																																				F	F					R
135	NKK-1/71, 70-79	91.245	Clays & tuffaceous sands		91.245
136	NKK-1/72,		Clays & tuffaceous sands
137	NKK-1/73, 37-46	92.715	Clays & tuffaceous sands	E13	92.715	P																																	C			F	F
138	NKK-1/74, 80-90	93.85	Clays & tuffaceous sands		93.85
139	NKK-1/75, 22-31	94.265	Clays & tuffaceous sands	E13	94.265	M-P																																				F	F		R			F
140	NKK-1/76, 25-35	94.8	Clays & tuffaceous sands		94.8
141	NKK-1/77, 4-13	95.585	Clays & tuffaceous sands	E13	95.585	P-M							R																								F		F			F	F					F
142	NKK-1/78, 40-48	96.44	Clays & tuffaceous sands		96.44
143	NKK-1/79, 9-18	96.635	Clays & tuffaceous sands	E13	96.635	M-P																																					F					F
144	NKK-1/80, 9-18	97.635	Clays & tuffaceous sands		97.635
145	NKK-1/81, 20-30	98.75	Clays & tuffaceous sands		98.75
146	NKK-1/82, 90-97	99.935	Clays & tuffaceous sands	E13	99.935	M-P													R?																								F					F
[truncated: 59 more columns]
